# Supplementary material for: Design and validation of HIV peptide pools for detection of HIV-specific CD4+ and CD8+ T cells
Source: PubMed Central journal article supplement (PMC9380920; doi:10.1371/journal.pone.0268370), 2022-08-16
Supplement: pone.0268370.s001.pdf [file pone.0268370.s001.pdf]

**Supplemental Table 1.** List of HIV class I peptides.

| sequence     | length | protein | Mapped Start Position | Mapped End Position |
|--------------|--------|---------|-----------------------|---------------------|
| GELDRWEKI    | 9      | Gag     | 11                    | 19                  |
| KIRLRPGGKK   | 10     | Gag     | 18                    | 27                  |
| IRLRPGGKKKY  | 11     | Gag     | 19                    | 29                  |
| RLRPGGKKKYKL | 12     | Gag     | 20                    | 31                  |
| RPGGKKKYKLL  | 11     | Gag     | 22                    | 32                  |
| KYKLLKHIVW   | 9      | Gag     | 28                    | 36                  |
| HLVWASRELERF | 12     | Gag     | 33                    | 44                  |
| ELRSLYNTV    | 9      | Gag     | 74                    | 82                  |
| RSLYNTVATLY  | 11     | Gag     | 76                    | 86                  |
| TLYCVHQK     | 8      | Gag     | 84                    | 91                  |
| IEIKDTKEAL   | 10     | Gag     | 92                    | 101                 |
| NSSKVSQNY    | 9      | Gag     | 124                   | 132                 |
| VQNLQGQMV    | 9      | Gag     | 135                   | 143                 |
| HQAISPRTLNAW | 12     | Gag     | 144                   | 155                 |
| VKVIEEKAF    | 9      | Gag     | 156                   | 164                 |
| EEKAFSPEVI   | 10     | Gag     | 160                   | 169                 |
| KAFSPEVIPMF  | 11     | Gag     | 162                   | 172                 |
| EVIPMFSAL    | 9      | Gag     | 167                   | 175                 |
| SEGATPQDL    | 9      | Gag     | 176                   | 184                 |
| TPQDLNMML    | 9      | Gag     | 180                   | 188                 |
| GHQAAMQML    | 9      | Gag     | 193                   | 201                 |
| KETINEEAAEW  | 11     | Gag     | 202                   | 212                 |
| AEWDRVHPV    | 9      | Gag     | 210                   | 218                 |
| HPVHAGPIA    | 9      | Gag     | 216                   | 224                 |
| GQMPREPRGSDI | 11     | Gag     | 226                   | 236                 |
| TSTLQEQIGW   | 10     | Gag     | 240                   | 249                 |
| NPPIPVGDY    | 10     | Gag     | 253                   | 262                 |
| EIYKRWII     | 8      | Gag     | 260                   | 267                 |
| KRWIILGLNK   | 10     | Gag     | 263                   | 272                 |
| RRWIQLGLQK   | 10     | Gag     | 263                   | 272                 |
| GLNKIVRMY    | 9      | Gag     | 269                   | 277                 |
| VRMYSVSI     | 9      | Gag     | 274                   | 282                 |
| YSPVSILDI    | 9      | Gag     | 277                   | 285                 |
| FRDYVDRFFKTL | 12     | Gag     | 293                   | 304                 |
| DRFYKTLRA    | 9      | Gag     | 298                   | 306                 |
| AEQASQEVKNWM | 12     | Gag     | 306                   | 317                 |
| VKNWMTETL    | 9      | Gag     | 313                   | 321                 |
| DCKTILKAL    | 9      | Gag     | 329                   | 337                 |
| ACQGVGGPGHK  | 11     | Gag     | 349                   | 359                 |
| GPGHKARVL    | 9      | Gag     | 355                   | 363                 |
| AEAMSQVTNS   | 10     | Gag     | 364                   | 373                 |
| CRAPRKKGC    | 9      | Gag     | 405                   | 413                 |

|              |    |       |     |     |
|--------------|----|-------|-----|-----|
| TERQANFL     | 8  | Gag   | 427 | 434 |
| RQANFLGKI    | 9  | Gag   | 429 | 437 |
| FLGKIWPSYK   | 10 | Gag   | 433 | 442 |
| KELYPLTSL    | 9  | Gag   | 481 | 489 |
| RVKEKYQHL    | 9  | gp160 | 2   | 10  |
| AENLWVTVYY   | 10 | gp160 | 31  | 40  |
| TVYYGVPVWK   | 10 | gp160 | 37  | 46  |
| VPVWKEATTTL  | 11 | gp160 | 42  | 52  |
| LFCASDAKAY   | 10 | gp160 | 52  | 61  |
| KAYETEVHNVW  | 11 | gp160 | 59  | 69  |
| DPNPQEVVL    | 9  | gp160 | 78  | 86  |
| MHEDIISLW    | 9  | gp160 | 104 | 112 |
| SVITQACPK    | 9  | gp160 | 199 | 207 |
| SFEPIPIHY    | 9  | gp160 | 209 | 217 |
| CAPAGFAIL    | 9  | gp160 | 218 | 226 |
| RPNNNTRKSI   | 10 | gp160 | 298 | 307 |
| HIGPGRAFY    | 9  | gp160 | 310 | 318 |
| RGPGRAFVTI   | 10 | gp160 | 311 | 320 |
| EIIGDIRQAY   | 10 | gp160 | 321 | 330 |
| SFNCGGEFF    | 9  | gp160 | 375 | 383 |
| LPCRKIQII    | 9  | gp160 | 416 | 424 |
| RIKQIINMW    | 9  | gp160 | 419 | 427 |
| RAIEAQQHM    | 9  | gp160 | 557 | 565 |
| QTRVLAIERYL  | 11 | gp160 | 577 | 587 |
| ERYLKDQQLL   | 10 | gp160 | 584 | 593 |
| TAVPWNASW    | 9  | gp160 | 606 | 614 |
| VFAVLSIVNR   | 10 | gp160 | 698 | 707 |
| IVNRNRQGY    | 9  | gp160 | 704 | 712 |
| RLRDLLIVTR   | 11 | gp160 | 770 | 780 |
| IVTRIVELL    | 9  | gp160 | 777 | 785 |
| GRRGWEALKY   | 10 | gp160 | 786 | 795 |
| KYCWNLLQY    | 9  | gp160 | 794 | 802 |
| QELKNSAVSL   | 10 | gp160 | 805 | 814 |
| SLLNATDIAV   | 10 | gp160 | 813 | 822 |
| EVAQRAYR     | 8  | gp160 | 831 | 838 |
| IPRRIRQGL    | 9  | gp160 | 843 | 851 |
| RIRQGLERA    | 9  | gp160 | 846 | 854 |
| RQGLERALL    | 9  | gp160 | 848 | 856 |
| WPTVRERM     | 8  | Nef   | 13  | 20  |
| RMRRAEPAA    | 9  | Nef   | 19  | 27  |
| LEKHGAITS    | 9  | Nef   | 37  | 45  |
| FPVTPQVPLR   | 10 | Nef   | 68  | 77  |
| RPQVPLRPMTY  | 11 | Nef   | 71  | 81  |
| RPQVPLRPMTYK | 12 | Nef   | 71  | 82  |
| PLRPMTYKAA   | 10 | Nef   | 75  | 84  |
| LRPMTYKAAL   | 10 | Nef   | 76  | 85  |

|              |    |     |     |     |
|--------------|----|-----|-----|-----|
| KAAVDLSHFL   | 10 | Nef | 82  | 91  |
| KAAVDLSHFLK  | 11 | Nef | 82  | 92  |
| GAFDLSFFL    | 9  | Nef | 83  | 91  |
| FLKEKGGL     | 8  | Nef | 90  | 97  |
| KEKGGLEGL    | 9  | Nef | 92  | 100 |
| KRQDILDLWVY  | 11 | Nef | 104 | 115 |
| RRQDILDLWVY  | 11 | Nef | 105 | 115 |
| HTQGYFPDWQNY | 12 | Nef | 116 | 127 |
| TQGYFPDWQNYT | 12 | Nef | 117 | 128 |
| YFPDWQNYTP   | 10 | Nef | 120 | 129 |
| YTPGPGIRY    | 9  | Nef | 127 | 135 |
| TPGPGVRYPL   | 10 | Nef | 128 | 137 |
| TRYPLTFGW    | 9  | Nef | 133 | 141 |
| RYPLTFGWCY   | 10 | Nef | 134 | 143 |
| YPLTFGWCYKL  | 11 | Nef | 135 | 145 |
| VLEWRFD SRL  | 10 | Nef | 180 | 189 |
| WRFDSRLAF    | 9  | Nef | 183 | 191 |
| NSPTRREL     | 8  | Pol | 24  | 31  |
| ITLWQRPLV    | 9  | Pol | 59  | 67  |
| DTVLEEWNL    | 9  | Pol | 86  | 94  |
| EEMNLPGRW    | 9  | Pol | 90  | 98  |
| RQYDQILIEI   | 10 | Pol | 113 | 122 |
| GKKAIGTVLV   | 10 | Pol | 124 | 133 |
| LVGPTPVNI    | 9  | Pol | 132 | 140 |
| TPVNIIGRNML  | 11 | Pol | 136 | 146 |
| FPISPIETV    | 9  | Pol | 155 | 163 |
| IETVPVKL     | 8  | Pol | 160 | 167 |
| GPKVKQWPL    | 9  | Pol | 173 | 181 |
| ALVEICTEMEK  | 11 | Pol | 188 | 198 |
| KLVDFRELNK   | 10 | Pol | 228 | 237 |
| GIPHPAGLK    | 9  | Pol | 248 | 256 |
| TVLDVGDAY    | 9  | Pol | 262 | 270 |
| VPLDEDFRKY   | 10 | Pol | 273 | 282 |
| YTAFTIPSV    | 9  | Pol | 282 | 290 |
| NETPGIRYQY   | 10 | Pol | 292 | 301 |
| IRYQYNVL     | 8  | Pol | 297 | 304 |
| LPQGWKGSPA   | 10 | Pol | 304 | 313 |
| SPAIFQSSM    | 9  | Pol | 311 | 319 |
| AIFQSSMTK    | 9  | Pol | 313 | 321 |
| KQNPDIYIY    | 9  | Pol | 328 | 336 |
| HPDIVIYQY    | 9  | Pol | 330 | 338 |
| NPEIVIYQY    | 9  | Pol | 330 | 338 |
| VIYQYMDDL    | 9  | Pol | 334 | 342 |
| IEELRQHLL    | 9  | Pol | 357 | 365 |
| IVLPEKDSW    | 9  | Pol | 399 | 407 |
| LVGKLNWASQIY | 12 | Pol | 415 | 426 |

|               |    |     |     |     |
|---------------|----|-----|-----|-----|
| QIYPGIKVR     | 9  | Pol | 424 | 432 |
| YPGIKVRQL     | 9  | Pol | 426 | 434 |
| IPLTEEAEL     | 9  | Pol | 448 | 456 |
| ILKEPVHGVY    | 10 | Pol | 464 | 473 |
| GQGQWTYQI     | 9  | Pol | 488 | 496 |
| IYQEPFKNLK    | 10 | Pol | 496 | 505 |
| RMRGAHTNDVK   | 11 | Pol | 511 | 521 |
| IAMESIVIW     | 9  | Pol | 530 | 538 |
| PIKETWETW     | 10 | Pol | 547 | 556 |
| GAETFYVDGAANR | 13 | Pol | 591 | 603 |
| ETKLGKAGY     | 9  | Pol | 604 | 612 |
| IVTDSQYALGI   | 11 | Pol | 650 | 660 |
| QIIEQLIKK     | 9  | Pol | 675 | 683 |
| LFLDGIDKA     | 9  | Pol | 715 | 723 |
| LPPIVAKEI     | 9  | Pol | 743 | 751 |
| THLEGKIIL     | 9  | Pol | 781 | 789 |
| HVASGYIEA     | 9  | Pol | 793 | 801 |
| IEAEVIPAET    | 10 | Pol | 799 | 808 |
| HTDNQSNF      | 8  | Pol | 829 | 836 |
| STTVKAACWW    | 10 | Pol | 838 | 847 |
| IQQEFGIPY     | 9  | Pol | 850 | 858 |
| VRDQAEHL      | 8  | Pol | 880 | 887 |
| KTAVQMAVF     | 9  | Pol | 888 | 896 |
| AVFIHNFKRK    | 10 | Pol | 894 | 903 |
| FKRKGIGGY     | 10 | Pol | 900 | 909 |
| GERIVDII      | 8  | Pol | 912 | 919 |
| IIATDIQTK     | 9  | Pol | 918 | 926 |
| KIQNFRVYY     | 9  | Pol | 934 | 942 |
| VPRRKAKII     | 9  | Pol | 975 | 983 |
| RKAKIIRDY     | 9  | Pol | 978 | 986 |
| KAVRLIKFLY    | 10 | Rev | 14  | 23  |
| QAVRIIKILY    | 10 | Rev | 14  | 23  |
| ERILSTYLGR    | 10 | Rev | 57  | 66  |
| RPAEPVPLQL    | 10 | Rev | 66  | 75  |
| CCFHCQVC      | 8  | Tat | 30  | 37  |
| FQTKGLGISYGR  | 12 | Tat | 38  | 49  |
| RIRTWKSLVK    | 10 | Vif | 17  | 26  |
| HMYISKKAK     | 9  | Vif | 28  | 36  |
| ISKKAKGWF     | 9  | Vif | 31  | 39  |
| HPRVSSEVHI    | 10 | Vif | 48  | 57  |
| IPLGDAKLII    | 10 | Vif | 57  | 66  |
| WHLGHGVSII    | 9  | Vif | 79  | 87  |
| LGHGVSIEW     | 9  | Vif | 81  | 89  |
| LADQLIHLHY    | 10 | Vif | 102 | 111 |
| KTKPPLPSVKK   | 11 | Vif | 158 | 168 |
| EAVRHFPRIW    | 10 | Vpr | 29  | 38  |

|            |    |     |    |    |
|------------|----|-----|----|----|
| AVRHFPRIWL | 10 | Vpr | 30 | 39 |
| FPRIWLHGL  | 9  | Vpr | 34 | 42 |
| ETYGDTWTGV | 10 | Vpr | 48 | 57 |
| DTWAGVEAIR | 11 | Vpr | 52 | 62 |
| AIIRILQQL  | 9  | Vpr | 59 | 67 |
| YRLGVGALI  | 9  | Vpu | 5  | 13 |
| EYRKILRQR  | 9  | Vpu | 29 | 37 |
