# Supplementary material for: Design and validation of HIV peptide pools for detection of HIV-specific CD4+ and CD8+ T cells
Source: PubMed Central journal article supplement (PMC9380920; doi:10.1371/journal.pone.0268370), 2022-08-16
Supplement: pone.0268370.s002.pdf [file pone.0268370.s002.pdf]

**Supplemental Table 2.** List of HIV class II peptides.

| sequence        | length | protein | Mapped<br>Start<br>Position | Mapped<br>End<br>Position |
|-----------------|--------|---------|-----------------------------|---------------------------|
| NCSFNATTVVRDRDQ | 15     | env     | 156                         | 170                       |
| NATTVVRDRKQTVYA | 15     | env     | 160                         | 174                       |
| VYALFYRLDIVPLTK | 15     | env     | 172                         | 186                       |
| RIHIGPGRAFYTTKN | 15     | env     | 308                         | 322                       |
| TGDIIGDIRQAHCNI | 15     | env     | 319                         | 333                       |
| GIIGDIRQAHCHVSR | 15     | env     | 321                         | 335                       |
| GAINTTNETFRPGGG | 15     | env     | 459                         | 473                       |
| RQANFLGKIWPSNKG | 15     | gag     | 429                         | 443                       |
| GRPGNFLQSRPEPTA | 15     | gag     | 443                         | 457                       |
| ESFRSGVETTTTPQK | 15     | gag     | 461                         | 475                       |
| EPIDKELYPLASLRS | 15     | gag     | 477                         | 491                       |
| DKELYPLASLRSFLG | 15     | gag     | 480                         | 494                       |
| TEKLWVTVYYGVPVW | 15     | gp160   | 31                          | 45                        |
| WVTVYYGVPVWKDAE | 15     | gp160   | 35                          | 49                        |
| GATTTLFCASDAKAY | 15     | gp160   | 47                          | 61                        |
| TTLFCASKAKAYDTE | 15     | gp160   | 50                          | 64                        |
| THACVPADPNPQEMV | 15     | gp160   | 71                          | 85                        |
| ENVTENFNMWKNEMV | 15     | gp160   | 87                          | 101                       |
| ENFNMWKNEMVNQMQ | 15     | gp160   | 91                          | 105                       |
| EMVNQMVEDVISLWD | 15     | gp160   | 99                          | 113                       |
| SLKPCVKLTPLCVSL | 15     | gp160   | 115                         | 129                       |
| CVKLTPLCVTLECRN | 15     | gp160   | 119                         | 133                       |
| KNCSFNISTSIRGKV | 15     | gp160   | 155                         | 169                       |
| DKMQKEYALLYKLDI | 15     | gp160   | 167                         | 181                       |
| INCNTSAITQACPKV | 15     | gp160   | 194                         | 208                       |
| VITQACPKVSFEPIP | 15     | gp160   | 200                         | 214                       |
| PKVTFDPIPIHYCTP | 15     | gp160   | 206                         | 220                       |
| FDPIPIHYCTPAGYA | 15     | gp160   | 210                         | 224                       |
| PAGFAILKCNKTFN  | 15     | gp160   | 220                         | 234                       |
| TNVSTVQCTHGRPIY | 15     | gp160   | 240                         | 254                       |
| RPVVSTQLLNGSLA  | 15     | gp160   | 252                         | 266                       |
| PVVSTQLLNGSLAE  | 15     | gp160   | 253                         | 267                       |
| EVVIRSANFTDNAKT | 15     | gp160   | 269                         | 283                       |
| IRSENITNNAKTIIV | 15     | gp160   | 272                         | 286                       |
| SANFTDNAKTIIVQL | 15     | gp160   | 274                         | 288                       |
| RIQRGPGRAFVTIGK | 15     | gp160   | 308                         | 322                       |
| EQRGPGRAFVTIGKI | 15     | gp160   | 309                         | 323                       |
| GRAFVTIGKIGNMRQ | 15     | gp160   | 314                         | 328                       |

|                 |    |       |     |     |
|-----------------|----|-------|-----|-----|
| CNISRAQWNNTLEQI | 15 | gp160 | 331 | 345 |
| SSGGKPEIVTHSFNC | 15 | gp160 | 364 | 378 |
| PEIVTHSFNCGGEFF | 15 | gp160 | 369 | 383 |
| GEFFYCNSTQLFNST | 15 | gp160 | 380 | 394 |
| EFFYCNTTQLFNNTW | 15 | gp160 | 381 | 395 |
| TQLFNSTWFNSTWST | 15 | gp160 | 388 | 402 |
| TWFNSTWSTKGSNNT | 15 | gp160 | 394 | 408 |
| TWSTKGSNNTEGSDT | 15 | gp160 | 399 | 413 |
| SSSIITIPCRIKQII | 15 | gp160 | 410 | 424 |
| TIPCRIKQIINMWQE | 15 | gp160 | 415 | 429 |
| IIKQIINMWQEVGRA | 15 | gp160 | 419 | 433 |
| RIKQIINMWQKVGKA | 15 | gp160 | 419 | 433 |
| KQIINMWQKVGQAMY | 15 | gp160 | 421 | 435 |
| INMWQEVGKAMYAPP | 15 | gp160 | 424 | 438 |
| VGRAMYAPPIKGNIT | 15 | gp160 | 430 | 444 |
| PIKGNITCKSNITGL | 15 | gp160 | 438 | 452 |
| GNSNNESEIFRPGGG | 15 | gp160 | 459 | 473 |
| ETFRPGGGDMRNNWR | 15 | gp160 | 466 | 480 |
| DMRDNRWSELYKYKV | 15 | gp160 | 474 | 488 |
| ELYKYKVVEIKPLGV | 15 | gp160 | 482 | 496 |
| YKVVEIKPLGVAPT  | 15 | gp160 | 486 | 500 |
| GIVQQQNNLLRAIEA | 15 | gp160 | 547 | 561 |
| QQHLLQLTVWGKQL  | 15 | gp160 | 562 | 576 |
| LTVWGKQLQARVLA  | 15 | gp160 | 568 | 582 |
| GKQLQARVLAVERY  | 15 | gp160 | 572 | 586 |
| EQIWNHTTWMEWDRE | 15 | gp160 | 620 | 634 |
| EESQNQQEKNEQELL | 15 | gp160 | 647 | 661 |
| ASLWNWFNITNWLWY | 15 | gp160 | 667 | 681 |
| IKLFIMIVGGLVGLR | 15 | gp160 | 682 | 696 |
| RTFIMIVGGLIGLRI | 15 | gp160 | 683 | 697 |
| FVVLISIVNRVRQGY | 15 | gp160 | 699 | 713 |
| DRVIEVVGQAYRAIR | 15 | gp160 | 827 | 841 |
| DRVIEVVGQAYRAIR | 15 | gp160 | 827 | 841 |
| AIRHIPRRIRQGLER | 15 | gp160 | 839 | 853 |
| HIPRRIRQGLERILL | 15 | gp160 | 842 | 856 |
| GKWSKSSIVGWSAVR | 15 | nef   | 3   | 17  |
| WSKSSIVGWPAVRER | 15 | nef   | 5   | 19  |
| LEKHGAITSSNTAAT | 15 | nef   | 37  | 51  |
| SSNTAATNAACAWLE | 15 | nef   | 45  | 59  |
| EVGFVIPQVPLRPM  | 15 | nef   | 65  | 79  |
| FPVRPQVPLRPMTYR | 15 | nef   | 68  | 82  |
| QVPLRPMTYKGALDL | 15 | nef   | 73  | 87  |
| AVDLSHFLKEKGGLM | 15 | nef   | 84  | 98  |

|                 |    |     |     |     |
|-----------------|----|-----|-----|-----|
| GWFLKEKGGLDGLIY | 15 | nef | 88  | 102 |
| SWFLKEKGGLEGLIY | 15 | nef | 88  | 102 |
| GWPFKLVDPREVQ   | 15 | nef | 140 | 154 |
| EVLMWKFDSRLAFHH | 15 | nef | 179 | 193 |
| VLEWRFDSRLAFHHV | 15 | nef | 180 | 194 |
| RWEFDSSLARRHLAR | 15 | nef | 182 | 196 |
| LAFHHVARELHPEYF | 15 | nef | 189 | 203 |
| IAPGQMREPRGSDIA | 15 | pol | 223 | 237 |
| MREPRGSDIAGTTST | 15 | pol | 228 | 242 |
| GSDIAGTTSTLQEQI | 15 | pol | 233 | 247 |
| STLQEQIGWMTNPP  | 15 | pol | 241 | 255 |
| EQIAWMTSNPPVPVG | 15 | pol | 245 | 259 |
| NPIPVGGEIYKRWII | 15 | pol | 253 | 267 |
| PVGEIYKRWIILGLN | 15 | pol | 257 | 271 |
| YKRWIILGLNKIVRM | 15 | pol | 262 | 276 |
| ILGLNKIVRMYSPPS | 15 | pol | 267 | 281 |
| IVRMYSPPSILDIKQ | 15 | pol | 273 | 287 |
| SPTSILDIRQGPKEP | 15 | pol | 278 | 292 |
| IRQGPKEPFRDYVDR | 15 | pol | 285 | 299 |
| GPKEPFRDYVDRFYK | 15 | pol | 288 | 302 |
| FRDYVDRFYKTLRAE | 15 | pol | 293 | 307 |
| DRFYKTLRAEQASQE | 15 | pol | 298 | 312 |
| TLRAEQASQEVKNWM | 15 | pol | 303 | 317 |
| RAEQASQEVKNWMTE | 15 | pol | 305 | 319 |
| LLVQANPDCKTILR  | 15 | pol | 321 | 335 |
| ILKALGPAATLEEMM | 15 | pol | 333 | 347 |
| LGPAATLEEMMTACQ | 15 | pol | 337 | 351 |
| PSHKARVLAEMSQA  | 15 | pol | 356 | 370 |
| QRGNFRNQRKTVKCF | 15 | pol | 379 | 393 |
| FNCGKEGHTARNCRA | 15 | pol | 393 | 407 |
| KEGHQMKDCTERQAN | 15 | pol | 418 | 432 |
| MKDCTERQANFLGKI | 15 | pol | 423 | 437 |
| QRPLVTIKIGGQLKE | 15 | pol | 495 | 509 |
| TPVNIIGRNLLTQIG | 15 | pol | 568 | 582 |
| NFPISPIETVPVKLR | 15 | pol | 586 | 600 |
| TEMEKEGKISKIGPE | 15 | pol | 626 | 640 |
| PSGLKKKKSVTVLDL | 15 | pol | 684 | 698 |
| FRKYTAFTIPSINNE | 15 | pol | 711 | 725 |
| GSPAIFQSSMTKILE | 15 | pol | 742 | 756 |
| SPAIFQSSMTKILEP | 15 | pol | 743 | 757 |
| IGQHRTKIEELRQHL | 15 | pol | 782 | 796 |
| KDSWTVNDIQKLVGK | 15 | pol | 836 | 850 |
| SWTVNDIQKLVGKLV | 15 | pol | 838 | 852 |

|                  |    |     |      |      |
|------------------|----|-----|------|------|
| VHDIQKLVGKLNWAS  | 15 | pol | 841  | 855  |
| QKLWGKLNWASQIYP  | 15 | pol | 845  | 859  |
| WRQLCKLLRGTKALT  | 15 | pol | 863  | 877  |
| GTKALTEVIPLTEEA  | 15 | pol | 872  | 886  |
| PLTEEALELELAENRE | 15 | pol | 881  | 895  |
| LAENREILKEPVHGV  | 15 | pol | 890  | 904  |
| TYQIYQEPFKNLKTG  | 15 | pol | 925  | 939  |
| QEPFKNLKTGKYAKM  | 15 | pol | 930  | 944  |
| YAKMRSHTNDVKQL   | 15 | pol | 941  | 955  |
| GKTPKFKLPIQKETW  | 15 | pol | 971  | 985  |
| IPEWEFVNTPLVKL   | 15 | pol | 998  | 1012 |
| WEFVNTPLVKLWYQ   | 15 | pol | 1001 | 1015 |
| LEKEPIVGAETFYVD  | 15 | pol | 1016 | 1030 |
| KEPIVGAETFYVDGA  | 15 | pol | 1018 | 1032 |
| EKVYLAWVPAHKGIG  | 15 | pol | 1116 | 1130 |
| KVYLAWVPAHKGIGG  | 15 | pol | 1117 | 1131 |
| HSNWRAMASDFNLPP  | 15 | pol | 1163 | 1177 |
| GKIILVAVHVASGYI  | 15 | pol | 1217 | 1231 |
| VTSGYIEAEVIPAET  | 15 | pol | 1226 | 1240 |
| HLKTAVQMAVYIHNF  | 15 | pol | 1318 | 1332 |
| KTAVQMAVFIHNFKR  | 15 | pol | 1320 | 1334 |
| AGERIVDIIATDIQT  | 15 | pol | 1343 | 1357 |
| QKQITKIQNFRVYYR  | 15 | pol | 1361 | 1375 |
| ISKFRVYYRDSRDPI  | 15 | pol | 1367 | 1381 |
| SDIKVVPRRKAKIIR  | 15 | pol | 1402 | 1416 |
| DEELIRTVRLIKLLY  | 15 | rev | 9    | 23   |
| SNPPNPEGTRQARR   | 15 | rev | 25   | 39   |
| SYHCLVCFQTKGLGI  | 15 | tat | 31   | 45   |
| ITKALGISYGRKKRR  | 15 | tat | 39   | 53   |
| KALGISYGRKKRRQR  | 15 | tat | 41   | 55   |
| DHQNLISKQPLPRTQ  | 15 | tat | 64   | 78   |
| SLQYLALVALVAPKK  | 15 | vif | 144  | 158  |
| RHFPRIWHLHGLGQHI | 15 | vpr | 32   | 46   |
| PRIWLHGLGQHIYET  | 15 | vpr | 35   | 49   |
| ETYGDTWAGVEAIIR  | 15 | vpr | 48   | 62   |
| DTWAGVEAIIRILQQ  | 15 | vpr | 52   | 66   |
| EAIIRILQQLLFIHF  | 15 | vpr | 58   | 72   |
| QLLFIHFRIGCRHSR  | 15 | vpr | 66   | 80   |
| IHFRIGCRHSRIGVT  | 15 | vpr | 70   | 84   |
| VLAIVALVVATIIAI  | 15 | vpu | 5    | 19   |
